# Supplementary material for: Adolescent - parent communication on sexual and reproductive health issues among high school students in Dire Dawa, Eastern Ethiopia: a cross sectional study
Source: PubMed Central journal article supplement (PMC4233096; doi:10.1186/1742-4755-11-77), 2014-11-07

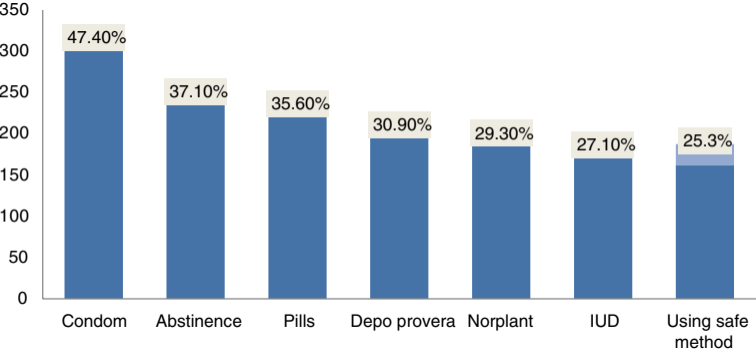

Supplement: 12978_2013_326_MOESM1_ESM.pdf [file 12978_2013_326_MOESM1_ESM.pdf]
